# Supplementary material for: Strong metal–support interactions in Pd/Co3O4 catalyst in wet methane combustion: in situ X-ray absorption study
Source: Royal Society of Chemistry journal article supplement (doi:10.1039/d0cy00465k), 2020-01-01
Supplement: d0cy00465k1.pdf [file d0cy00465k1.pdf]

## Electronic Supplementary Information

### **Strong metal-support interactions in Pd/Co<sub>3</sub>O<sub>4</sub> catalyst in wet methane combustion: *in situ* X-ray absorption study**

William Barrett,<sup>a#</sup> Somaye Nasr,<sup>b#</sup> Jing Shen,<sup>b</sup> Yongfeng Hu,<sup>c</sup> Robert E. Hayes,<sup>b</sup> Robert W.J. Scott,<sup>a,\*</sup> Natalia Semagina<sup>b,\*</sup>

<sup>a</sup> *Department of Chemistry, University of Saskatchewan, 110 Science Place, Saskatoon S7N 5C9 Canada;*

<sup>b</sup> *Department of Chemical and Materials Engineering, University of Alberta, 9211-116 St. Edmonton, Alberta T6G 1H9 Canada;*

<sup>c</sup> *Canadian Light Source Inc., 44 Innovation Boulevard, Saskatoon S7N 2V3 Canada*

*Corresponding authors:*

*Natalia Semagina [semagina@ualberta.ca](mailto:semagina@ualberta.ca); Robert W.J. Scott [robert.scott@usask.ca](mailto:robert.scott@usask.ca)*

<sup>#</sup>these two authors contributed equally and are listed in alphabetical order

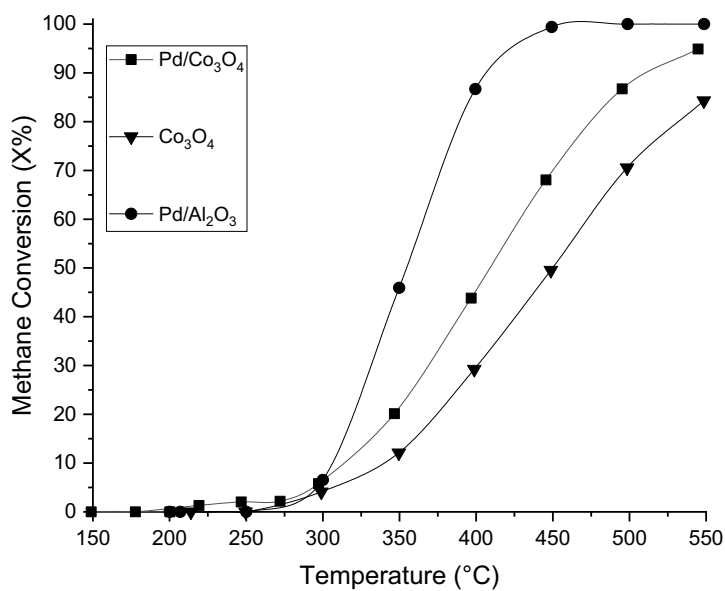

Fig. S1. Methane combustion activity of the prereduced catalysts (300 °C, in H<sub>2</sub>) in the wet feed. 0.3 g catalyst loading, with 0.3 wt.% Pd in each of Co<sub>3</sub>O<sub>4</sub> and Al<sub>2</sub>O<sub>3</sub>. Pd dispersion is 12% in Pd/Co<sub>3</sub>O<sub>4</sub> and 40% in Pd/Al<sub>2</sub>O<sub>3</sub>.
